# Supplementary material
Source: PubMed Central journal article supplement (PMC2268819)
Supplement: pnas_0709909105_1.pdf [file pnas_0709909105_1.pdf]

**Table 3. Amino acids identified in the GRA 95229 meteorite**

| Amino acid (a.)                                                                                        | Concentration <sup>†</sup> (nmol/g <sup>‡</sup> ) |                 |
|--------------------------------------------------------------------------------------------------------|---------------------------------------------------|-----------------|
|                                                                                                        | Unhydrolyzed                                      | Hydrolyzed      |
| <b>Linear <math>\alpha</math>-amino acids R-CH(NH<sub>2</sub>)-COOH</b>                                |                                                   |                 |
| glycine                                                                                                | 509.7                                             | 751.3           |
| alanine                                                                                                | 513.5                                             | 642.6           |
| 2-aminobutyric a.                                                                                      | 145.7                                             | 183.8           |
| 2-aminovaleric a.                                                                                      | 13.7                                              | 31.6            |
| 2-aminohexanoic a.                                                                                     | 5.6                                               | ND <sup>§</sup> |
| <b>2-methyl <math>\alpha</math>-amino acids R-C(CH<sub>3</sub>)(NH<sub>2</sub>)-COOH</b>               |                                                   |                 |
| 2-aminoisobutyric a.                                                                                   | 246.0                                             | 237.2           |
| isovaline                                                                                              | 62.5                                              | 59.1            |
| 2-methylnorvaline                                                                                      | 6.5                                               | 6               |
| 2,3-dimethylbutyric a.                                                                                 | <1                                                | <1              |
| 2-methylhexanoic                                                                                       | <1                                                | <1              |
| <b>Other branched <math>\alpha</math>-amino acids, R-CH(CH<sub>3</sub>)-(R)CH(NH<sub>2</sub>)-COOH</b> |                                                   |                 |
| valine                                                                                                 | 25.1                                              | ND              |
| isoleucine                                                                                             | 8.8                                               | “               |
| alloisoleucine                                                                                         | 20.4                                              | “               |
| leucine                                                                                                | 21.7                                              | “               |
| 2-amino-3-methylhexanoic a.                                                                            | ND                                                | <1              |
| 2-amino-4-methylhexanoic a.                                                                            | ND                                                | <1              |
| <b>Non-<math>\alpha</math>-amino acids R-CH<sub>2</sub>(NH<sub>2</sub>)-R-COOH</b>                     |                                                   |                 |
| $\beta$ -alanine                                                                                       | ND                                                | 72              |
| $\beta$ -aminobutyric a.                                                                               | 20.0                                              | 37              |
| $\beta$ -aminoisobutyric a.                                                                            | 19.4                                              | 29.8            |
| $\gamma$ -aminobutyric a.                                                                              | 8.5                                               | 29.2            |
| $\beta$ -aminopentanoic a.                                                                             | ND                                                | 7.0             |
| $\beta$ -amino-3-methylbutyric                                                                         | ND                                                | 6.55            |
| $\gamma$ -aminopentanoic a.                                                                            | ND                                                | 23.1            |
| $\delta$ -aminovaleric a.                                                                              | 2                                                 | 12.0            |
| <b>Dicarboxylic <math>\alpha</math>-amino acids HOOC-R-CH(NH<sub>2</sub>)-COOH</b>                     |                                                   |                 |
| aspartic a.                                                                                            | 6.6                                               | <1              |
| glutamic a.                                                                                            | 49.6                                              | 205.4           |
| 2-aminoadipic a.                                                                                       | 2.2                                               | 7.9             |
| 2-methylglutamic a.                                                                                    | NF                                                | 2.1             |
| <b>N-cyclic amino acids</b>                                                                            |                                                   |                 |
| proline                                                                                                | 28.0                                              | 34.6            |
| pipecolic a.                                                                                           | 25.0                                              | 44.2            |
| <b><math>\beta</math>-hydroxy <math>\alpha</math>-amino acids R-C(OH)-CH(NH<sub>2</sub>)-COOH</b>      |                                                   |                 |
| serine                                                                                                 | 7.2                                               | ND              |
| threonine                                                                                              | 17.9                                              | “               |
| allothreonine                                                                                          | 4.4                                               | “               |

NF, not found. ND, not determined due to chromatographic coelutions

<sup>†</sup>Concentrations were measured by GC-MS and are approximate by  $\pm 4\%$ .

<sup>‡</sup>Nanomole/gram of meteorite.

<sup>§</sup>Not determined due to chromatographic coelutions.
