# Supplementary material
Source: PubMed Central journal article supplement (PMC2268819)
Supplement: pnas_0709909105_2.pdf [file pnas_0709909105_2.pdf]

**Table 4. Monocarboxylic acids identified in the GRA 95229 meteorite**

| <b>Carboxylic acid (R-COOH)<sup>†</sup></b> | <b>Nanomole/g</b> |
|---------------------------------------------|-------------------|
| formic                                      | 0.7               |
| acetic                                      | 86.2              |
| propionic                                   | 42.2              |
| 2-methylpropionic                           | 35.6              |
| butyric                                     | 125.5             |
| S (+) 2-methylbutyric                       | 21.0              |
| R (-) 2-methylbutyric                       | 21.9              |
| 3-methylbutyric                             | 32.4              |
| pentanoic                                   | 143.6             |
| (±) 2-methylpentanoic                       | 22.9              |
| 3-methylpentanoic                           | 32.2              |
| 4-methylpentanoic                           | 19.8              |
| cyclohexane carboxylic a.                   | 4.3               |
| hexanoic                                    | 97.2              |
| 3-ethylpentanoic                            | 9.5               |
| heptanoic                                   | 45.4              |
| S (+) 2-ethylhexanoic                       | 22.0              |
| R (-) 2-ethylhexanoic                       | 27.1              |
| octanoic                                    | 31.3              |
| nonanoic                                    | 32.5              |
| decanoic                                    | 4.9               |
| benzoic                                     | 49.8              |

<sup>†</sup>Concentrations were measured by GC-MS and are approximate by  $\pm 4\%$ .
