# Supplementary material
Source: PubMed Central journal article supplement (PMC2268819)
Supplement: pnas_0709909105_3.pdf [file pnas_0709909105_3.pdf]

**Table 5. Hydroxy acids identified in the GRA 95229 meteorite**

| <b>Hydroxy Acid (a.)</b>                                                       | <b>Nanomole/g<sup>†</sup></b> |
|--------------------------------------------------------------------------------|-------------------------------|
| <b>Linear <math>\alpha</math>-hydroxy acids R-CH(OH)-COOH</b>                  |                               |
| glycolic                                                                       | 128.8                         |
| DL-lactic                                                                      | 387.1                         |
| D 2-hydroxybutyric                                                             | 55.3                          |
| L 2-hydroxybutyric                                                             | 55.5                          |
| DL-2-hydroxyvaleric                                                            | 20.5                          |
| DL -2-hydroxycaproic                                                           | 2.4                           |
| <b>Branched <math>\alpha</math>-hydroxy acids R-C(CH<sub>3</sub>)(OH)-COOH</b> |                               |
| 2-hydroxyisobutyric                                                            | 87.8                          |
| D -2-hydroxy-2-methylbutyric                                                   | 21.7                          |
| L -2-hydroxy-2-methylbutyric                                                   | 21.9                          |
| D -2-hydroxy-3-methylbutyric                                                   | 3.0                           |
| L -2-hydroxy-3-methylbutyric                                                   | 3.0                           |
| <b>Dicarboxylic hydroxy acids HOOC-R-CH(OH)-COOH</b>                           |                               |
| DL maleic                                                                      | 7.6                           |
| DL 2-hydroxyglutaric                                                           | 7.7                           |
| DL citramalic                                                                  | ≤1                            |

<sup>†</sup>Concentrations were measured by GC-MS and are approximate by  $\pm 4\%$ .
