# Supplementary material
Source: PubMed Central journal article supplement (PMC2268819)
Supplement: pnas_0709909105_6.pdf [file pnas_0709909105_6.pdf]

**Table 8. Polycyclic aromatic hydrocarbons identified in the GRA 95229 meteorite**

| <b>Compound (no. of isomers)</b>          | <b>nmole/g<sup>†</sup></b> |
|-------------------------------------------|----------------------------|
| naphthalene                               | 15.0                       |
| methylnaphthalene (2)                     | 10                         |
| dimethyl (or ethyl)naphthalene (10)       | 4.                         |
| trimethyl(or methylethyl)naphthalene (11) | 1                          |
| phenanthrene                              | 15.                        |
| anthracene                                | 1.5                        |
| methylphenanthrene/anthracene (4)         | ≤1                         |
| pyrene                                    | 15                         |
| fluoranthene                              | 15                         |
| methylfluoranthene/pyrene (80)            | ≤1                         |
| benzophenanthrene                         | ≤1                         |
| perylene                                  | ≤1                         |
| benzoperylene                             | ≤1                         |
| acenaphthene                              | 5                          |
| biphenyl                                  | 5                          |
| terphenyl                                 | 1                          |
| cyclohexylbenzene                         | 5                          |
| fluorene                                  | 1                          |
| cyclophenanthrene                         | 1                          |
| anthrone                                  | ≤1                         |
| anthracenedione                           | ≤1                         |
| 9H fluorine-9-one                         | ≤1                         |
| benzothiophene                            | ≤1                         |
| dimethyldisulfide                         | ≤1                         |
| dimethytrisulfide                         | ≤1                         |

<sup>†</sup>Nanomole/g of meteorite.
